# Supplementary material for: Longitudinal Coupling between Eating Disorder Psychopathology and Depression in Patients with Anorexia Nervosa and Bulimia Nervosa Treated with Enhanced Cognitive Behavior Therapy: A One-Year Follow-Up Study
Source: MDPI journal article supplement (doi:10.3390/brainsci13040535), 2023-03-24
Supplement: s1 [file s1]

# Longitudinal Coupling between Eating Disorder Psychopathology and Depression in Patients with Anorexia Nervosa and Bulimia Nervosa Treated with Enhanced Cognitive Behavior Therapy: A One-Year Follow-Up Study

Emanuele Cassioli, Eleonora Rossi, Michela Martelli, Francesca Arganini, Gabriele Giuranno, Serena Siviglia, Livio Tarchi, Marco Faldi, Giovanni Castellini \* and Valdo Ricca

Psychiatry Unit, Department of Health Sciences, University of Florence, Largo Brambilla 3, 50100 Florence, Italy

## Supplementary Materials

**Supplementary Table S1.** Characteristics of the sample at baseline and follow-up, divided by baseline diagnosis. Results of longitudinal analysis in patients are reported using age and BMI-adjusted unstandardized coefficients (time, group, and interaction fixed effects).

|                      | Anorexia Nervosa                  |                                    | Bulimia Nervosa                   |                                    | Time Effect<br>(b) | Group Effect<br>(b) | Time*Group<br>Interaction Effect<br>(b) |
|----------------------|-----------------------------------|------------------------------------|-----------------------------------|------------------------------------|--------------------|---------------------|-----------------------------------------|
|                      | Baseline<br><i>T0</i><br>(n = 92) | Follow-up<br><i>T1</i><br>(n = 73) | Baseline<br><i>T0</i><br>(n = 65) | Follow-up<br><i>T1</i><br>(n = 48) |                    |                     |                                         |
| Age (years)          | 24.41 ± 9.14                      | -                                  | 27.11 ± 10.86                     | -                                  |                    |                     |                                         |
| Education (years)    | 12.38 ± 3.09                      | -                                  | 13.52 ± 2.73                      | -                                  |                    |                     |                                         |
| Age of onset (years) | 17.54 ± 4.03                      | -                                  | 17.97 ± 6.45                      | -                                  |                    |                     |                                         |
| EDE-Q Total Score    | 3.21 ± 1.64                       | 2.29 ± 1.78                        | 3.75 ± 1.44                       | 2.73 ± 1.50                        | -1.10***           | 0.41                | 0.19                                    |
| BDI                  | 22.47 ± 11.59                     | 14.00 ± 13.17                      | 23.23 ± 11.24                     | 13.62 ± 10.81                      | -9.10***           | 2.08                | -0.36                                   |
| SCL-90-R GSI         | 1.43 ± 0.78                       | 1.07 ± 0.82                        | 1.65 ± 0.68                       | 1.13 ± 0.71                        | -0.42***           | 0.30                | -0.06                                   |

\*  $p < 0.05$ , \*\*  $p < 0.01$ , \*\*\*  $p < 0.001$ ; BDI, Beck Depression Inventory; BMI, Body Mass Index; EDE-Q, Eating Disorders Examination Questionnaire; SCL-90-R GSI, Symptom Checklist-90-Revised Global Severity Index.
